# Supplementary material for: Achieving rapid analysis of Li isotopes in high-matrix and low-Li samples with MC-ICP-MS: new developments in sample preparation and mass bias behavior of Li in ICPMS
Source: Royal Society of Chemistry journal article supplement (doi:10.1039/c9ja00076c), 2019-01-01
Supplement: c9ja00076c1.xlsx [file c9ja00076c1.xlsx]

## Sheet: Sheet1
Sample type, Li concentration	δ 7LiL-svec ‰	2σ	Average ‰	long term external 2σ
Seawater,174ppb	30.13	0.04	30.6797	0.471945
	30.23	0.02
	30.24	0.07
	30.34	0.06
	30.47	0.06
	30.48	0.07
	30.5	0.05
	30.5151	0.0591746
	30.56	0.04
	30.58	0.03
	30.5843	0.0615904
	30.6074	0.0180279
	30.6093	0.0347272
	30.64	0.02
	30.66	0.05
	30.6615	0.0404173
	30.6803	0.0589302
	30.6886	0.0938224
	30.69	0.03
	30.7145	0.023206
	30.72	0.02
	30.73	0.03
	30.7334	0.0323538
	30.7348	0.0202594
	30.8	0.02
	30.8211	0.0548253
	30.825	0.0348134
	30.85	0.04
	30.8665	0.0666217
	30.91	0.06
	30.94	0.05
	30.9753	0.0411399
	30.9927	0.0904967
	31.12	0.05
	31.1896	0.0624792
GSR-1,130ppm	1.65	0.11	1.52857	0.261388
	1.69	0.02
	1.39	0.02
	1.43	0.02
	1.56	0.04
	1.61	0.04
	1.37	0.08
GSP-2,36ppm	-0.66	0.08	-0.58	0.169115
	-0.51	0.02
	-0.55	0.03
	-0.5	0.03
	-0.68	0.02
BCR-2,9ppm	3.41	0.07	3.19333	0.387333
	3.22	0.04
	3.21	0.03
	2.92	0.05
	3.02	0.02
	3.38	0.04
BHVO-2,4.7ppm	4.39	0.02	4.58167	0.384378
	4.57	0.05
	4.77	0.04
	4.44	0.05
	4.86	0.03
	4.46	0.04
AGV-2,11ppm	7.07	0.07	6.86	0.393954
	6.84	0.02
	6.68	0.08
	7.13	0.06
	6.77	0.04
	6.67	0.05
GSR-12,2.3ppm	13.33	0.05	13.5483	0.367351
	13.47	0.09
	13.38	0.04
	13.62	0.06
	13.7	0.03
	13.79	0.06
